# Supplementary material for: A PRDX1 mutant allele causes a MMACHC secondary epimutation in cblC patients
Source: PubMed Central journal article supplement (PMC5754367; doi:10.1038/s41467-017-02306-5), 2018-01-04
Supplement: 41467_2017_2306_MOESM1_ESM.pdf [file 41467_2017_2306_MOESM1_ESM.pdf]

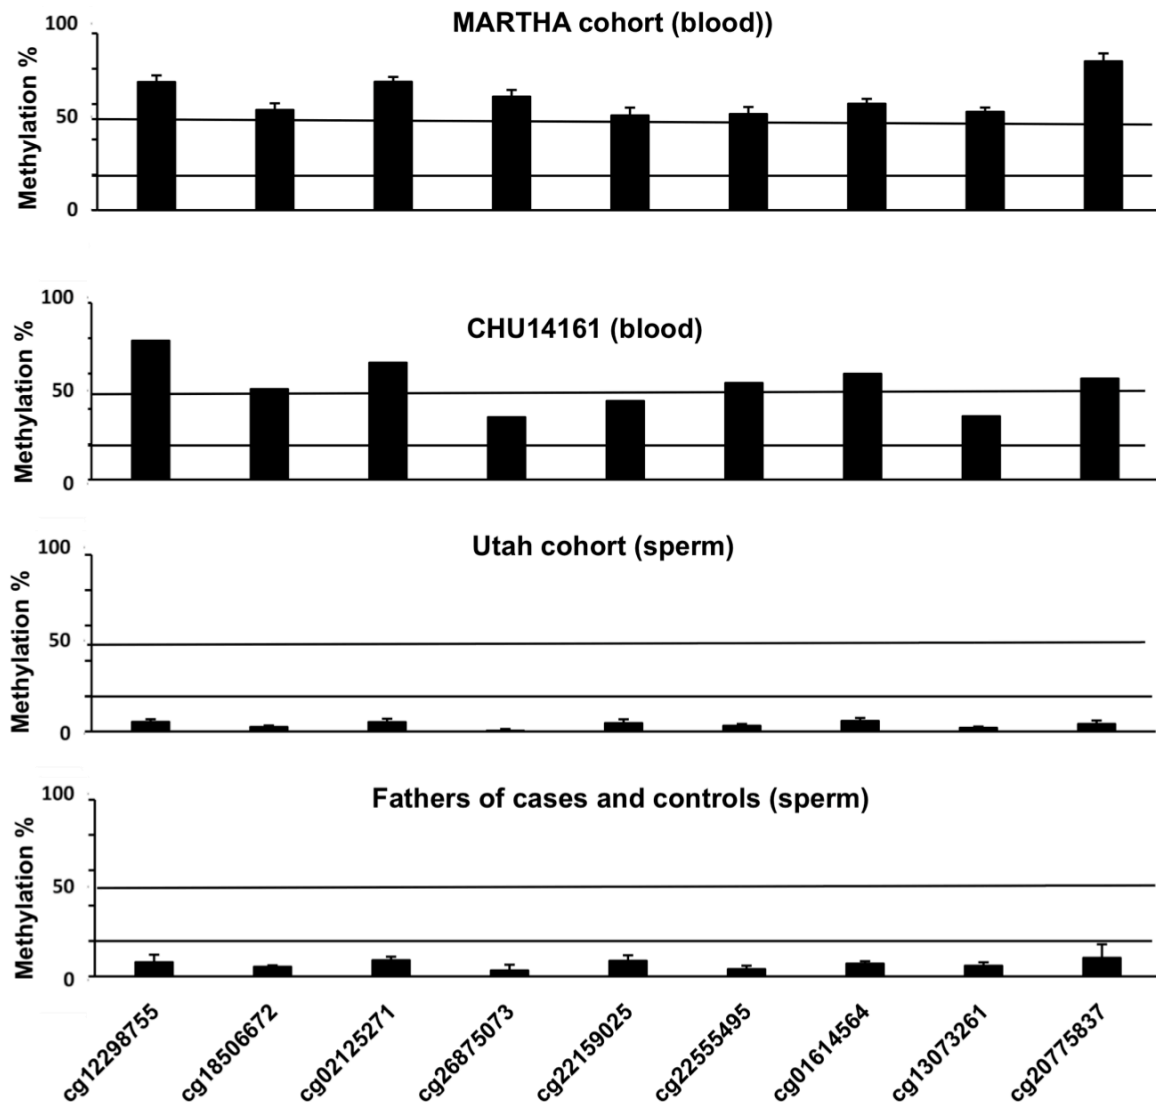

**Supplementary Figure 1. Methylation analysis of SNRPN imprinted gene in sperm from proband’s fathers.** The absence of contamination of sperm DNA by somatic DNA was proven by methylation analysis of *SNRPN* imprinted gene. As expected, *SNRPN* was unmethylated in sperm DNA from the fathers and two paired controls and UTAH cohort and methylated in the blood DNA from the MARTHA cohort (mean +/- standard deviation of beta values) and from the father of case 12122 (CHU14161). The analysis is based on  $\beta$ -values obtained from the Infinium HumanMethylation450 Bead Chip array. The line corresponds to a  $\beta$  value threshold of 0.2, below which the CpG probe was considered fully unmethylated.

**Supplementary Table 1:** *Epi-CblC* cases and their relatives with *MMACHC* monoallelic coding mutation, *MMACHC* epimutation and *PRDX1 c.515-1G>T* mutation (ND: not determined)

| Identification code | Proband/ relatives | MMACHC heterozygous mutation               | Epimutation in MMACHC | PRDX1 c.515-1G>T | Antisense lncRNA* | Age      | Gender | Ethnicity/ country            |
|---------------------|--------------------|--------------------------------------------|-----------------------|------------------|-------------------|----------|--------|-------------------------------|
| MG-002151           | Case               | <i>c.617G&gt;A</i><br>(p.Arg206Gln)        | yes                   | GT               | Yes               | 63 years | M      | Caucasian /Italy<br>Caucasian |
| MG-002153           | Case               | <i>c.271dupA</i><br>(p.Arg91Lysfs X14)     | yes                   | GT               | Yes               | 3 weeks  | F      | /Australia                    |
| F-R1                | Case               | <i>c.271 dupA</i>                          | yes                   | GT               | Yes               | 6 years  | M      | Caucasian /France             |
| F- R11              | Father F-44744     | <i>wt</i>                                  | yes                   | GT               | ND                | 40 years | M      | Caucasian /France             |
| F-R12               | Mother F-44744     | <i>c.271 dupA</i>                          | no                    | GG               | ND                | 33 years | F      | Caucasian /France             |
| F-R2                | Case               | <i>c.481C&gt;T</i><br>( <i>p.Arg161X</i> ) | yes                   | GT               | Yes               | 8 years  | F      | Caucasian /France             |
| F-R21               | Father F-40039     | <i>c.481C&gt;T</i><br>( <i>p.Arg161X</i> ) | no                    | GG               | ND                | 42 years | M      | Caucasian /France             |
| F-R22               | Mother F-40039     | <i>wt</i>                                  | yes                   | GT               | ND                | 32 years | F      | Caucasian /France             |
| F-R3                | Case               | <i>c.271 dupA</i>                          | yes                   | GT               | ND                | 5 years  | F      | Caucasian /France             |
| F-R31               | Father F-50747     | <i>c.271 dupA</i>                          | no                    | GG               | ND                | 39 years | M      | Caucasian /France             |

**Supplementary Table 2.** List of genes reverse (R1)-forward (F2)-reverse (R3) gene trios, with recessive transmission of inherited diseases produced by R2 gene mutations and Triplex Target Sites (TTS) and CpG island in R1/F2 bidirectional promoter

| R1 reverse gene       | F2 forward gene | R3 reverse gene      | CpG island, R1-F2 | CpG island R1-F2 (methylation status) | OMIM-R1 (OMIM#)                          | OMIM-F2 (OMIM#)                                                                                                                                                                           | OMIM-R3 (OMIM#)                                    |
|-----------------------|-----------------|----------------------|-------------------|---------------------------------------|------------------------------------------|-------------------------------------------------------------------------------------------------------------------------------------------------------------------------------------------|----------------------------------------------------|
| <i>CCDC163P</i> †     | <i>MMACHC</i> * | <i>PRDX1</i>         | CpG: 33           | Unmethylated                          | Non-Morbid                               | Methylmalonic aciduria and homocystinuria, cblC type, (277400)                                                                                                                            | Non-Morbid                                         |
| <i>AUPI</i>           | <i>HTRA2</i> *  | <i>LOXL3</i>         | CpG: 153          | Unmethylated                          | Non-Morbid                               | Parkinson disease 13, 610297 (3)                                                                                                                                                          | Non-Morbid                                         |
| <i>CIDECP</i> †       | <i>FANCD2</i> * | <i>FANCD2OS</i>      | CpG: 41           | Unmethylated                          | Not referenced                           | Fanconi anemia, complementation group D2                                                                                                                                                  | Not referenced                                     |
| <i>UBE2D3</i>         | <i>CISD2</i> *  | <i>SLC9B1</i>        | CpG: 141          | Unmethylated                          | Not referenced                           | Wolfram syndrome 2, (604928)                                                                                                                                                              | Non-Morbid                                         |
| <i>ENC1</i>           | <i>HEXB</i> *   | <i>GFM2</i>          | CpG: 160          | Unmethylated                          | Non-Morbid                               | Sandhoff disease, infantile, juvenile, and adult forms, 268800 (3); Spinal muscular (atrophy, juvenile)                                                                                   | Non-Morbid                                         |
| <i>MGAT4B</i>         | <i>SQSTM1</i> * | <i>C5orf45</i>       | CpG: 193          | Unmethylated                          | Non-Morbid                               | Paget disease of bone, (602080)                                                                                                                                                           | Not referenced                                     |
| <i>LOC100129518</i> ‡ | <i>ACAT2</i> *  | <i>TCP1</i>          | CpG: 105          | Unmethylated                          | Not referenced                           | ACAT2 deficiency (1)                                                                                                                                                                      | Non-Morbid                                         |
| <i>MCM7</i>           | <i>AP4M1</i> *  | <i>TAF6</i>          | CpG: 141          | Unmethylated                          | Non-Morbid                               | Cerebral palsy, spastic quadriplegic, 3, (612936)                                                                                                                                         | Non-Morbid                                         |
| <i>LOC101927612</i> ‡ | <i>RNF139</i> * | <i>TATDN1</i>        | CpG: 92           | Unmethylated                          | Not referenced                           | Renal cell carcinoma, (144700)                                                                                                                                                            | Not referenced                                     |
| <i>DUOX2</i> *        | <i>DUOX2</i> *  | <i>DUOXA1</i>        | CpG: 35           | Unmethylated                          | Thyroid dys-hormonogenesis 6, 607200 (3) | Thyroid dys-hormonogenesis 5, 274900                                                                                                                                                      | Non-Morbid                                         |
| <i>TIPIN</i>          | <i>MAP2K1</i> * | <i>SNAPC5</i>        | CpG: 114          | Hemimethylated                        | Non-Morbid                               | Cardiofaciocutaneous syndrome, (115150)                                                                                                                                                   | Non-Morbid                                         |
| <i>TSR3</i>           | <i>GNPTG</i> *  | <i>UNKL</i>          | CpG: 122          | Unmethylated                          | Not referenced                           | Mucopolidiosis III gamma, (252605)                                                                                                                                                        | Not referenced                                     |
| <i>NTHL1</i>          | <i>TSC2</i> *   | <i>PKD1</i> *        | CpG: 94           | Unmethylated                          | Non-Morbid                               | Lymphangi leiomyomatosis, somatic, (606690) ,Tuberous sclerosis-2, (191100) {Systemic lupus erythematosus, susceptibility to}, (152700)                                                   | Polycystic kidney disease, adult type I, (173900)  |
| <i>SLX4</i>           | <i>DNASE1</i> * | <i>TRAP1</i>         | CpG: 67           | Unmethylated                          | Not referenced                           |                                                                                                                                                                                           | Non-Morbid                                         |
| <i>VPS9D1</i>         | <i>ZNF276</i>   | <i>FANCA</i> *       | CpG: 227          | Unmethylated                          | Not referenced                           | Non-Morbid                                                                                                                                                                                | Fanconi anemia, complementation group A, (227650)  |
| <i>SHPK</i>           | <i>CTNS</i> *   | <i>P2RX5-TAX1BP3</i> | CpG: 114          | Unmethylated                          | Non-Morbid                               | Cystinosis, nephropathic, (219800); Cystinosis, ocular nonnephropathic, (219750); Cystinosis, late-onset juvenile or adolescent nephropathic, (219900); Cystinosis, atypical nephropathic | Non-Morbid                                         |
| <i>MEF2BNB</i>        | <i>RFXANK</i> * | <i>NR2C2AP</i>       | CpG: 30 + CpG: 19 | Unmethylated                          | Not referenced                           | MHC class II deficiency, complementation group B, (209920)                                                                                                                                | Non-Morbid                                         |
| <i>ADCK4</i> ‡        | <i>ITPKC</i> *  | <i>C19orf54</i>      | CpG: 56           | Unmethylated                          | Not referenced                           | {Kawasaki disease, susceptibility to}, (611775)                                                                                                                                           | Not referenced                                     |
| <i>NEURL2</i>         | <i>CTSA</i> *   | <i>PLTP</i> *        | CpG: 141          | Unmethylated                          | Non-Morbid                               | Galactosialidosis                                                                                                                                                                         | [High density lipoprotein cholesterol level QTL 9] |

**NOTE.** R1: Reverse-1; F2: Forward-2; R3: Reverse-3; OMIM: Online Mendelian Inheritance in Man; TTS: triplex target DNA sites; \*Genes with pathogenic annotation on OMIM database; † Pseudogene; ‡ Uncharacterized

**Supplementary Table 3.** Primers used in PCR, RT-PCR and qRT-PCR experiments

| Application                 | Primer Name   | Direction | Primer sequences 5'→3'     |
|-----------------------------|---------------|-----------|----------------------------|
| Bisulfite converted DNA PCR | MMACHC_BS_F   | forward   | TTAAATTTGTGTTAGTGATAATTGT  |
| Bisulfite converted DNA PCR | MMACHC_BS_R   | reverse   | AACTAACCTAAAAAAAAATAAACCTC |
| RT-PCR                      | MMACHC_cDNA_F | forward   | CAGCAAGCTCAGCGTGTAAC       |
| RT-PCR                      | MMACHC_cDNA_R | reverse   | CCACCATAAATCAGGGTCCA       |
| RT-PCR                      | PRDX1_S       | forward   | CATTCCTTTGGTATCAGACCCG     |
| RT-PCR                      | CCDC163P_AS   | reverse   | AGCGTTGAGAAGCACATCCA       |
| qRT-PCR                     | MMACHC        | forward   | ATCTGGGCCGTGTTAGAGAGA      |
| qRT-PCR                     | MMACHC        | reverse   | CCTCCACATCTTGTCGTTGG       |
| qRT-PCR                     | <i>PRDX1</i>  | forward   | CCACGGAGATCATTGCTTTCA      |
| qRT-PCR                     | <i>PRDX1</i>  | reverse   | AGGTGTATTGACCCATGCTAGAT    |
| qRT-PCR                     | <i>POLR2A</i> | forward   | CAGACCGGCTATAAGGTGGA       |
| qRT-PCR                     | <i>POLR2A</i> | reverse   | GGTAGACCATGGGAGAATGC       |
